# Supplementary material
Source: bioRxiv or medRxiv preprint supplement (https://www.biorxiv.org/highwire/filestream/3552/field_highwire_adjunct_files/1/013946-2.pdf)

A 'TaxaMin30' ML tree

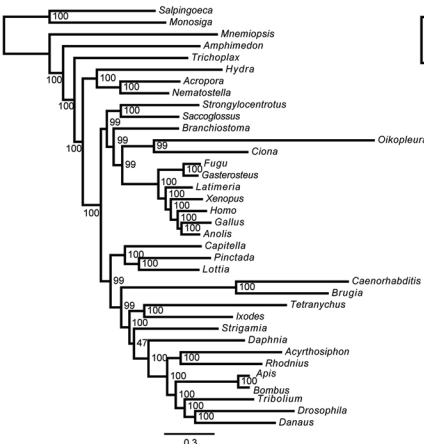

B 'TaxaMin33' ML tree

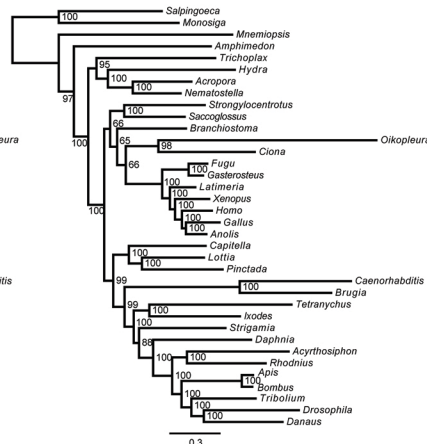

C 'TaxaMin35' ML tree

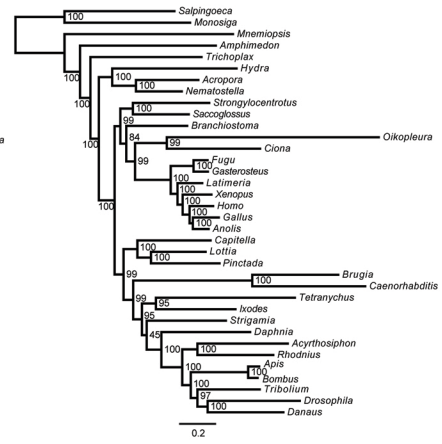

D '60Boot' ML tree

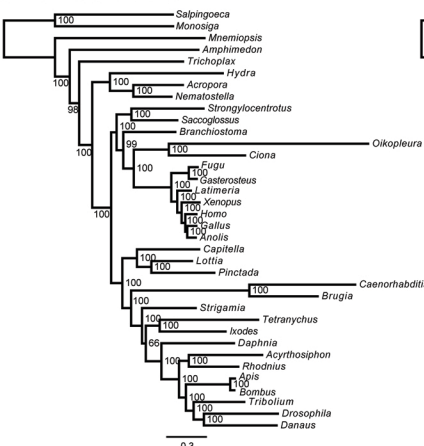

E 'MareMatrix' ML tree

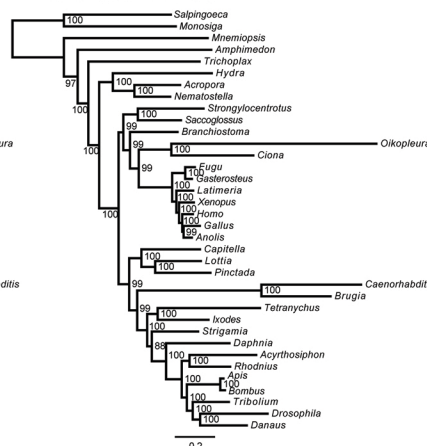

F 'Slow108' ML tree

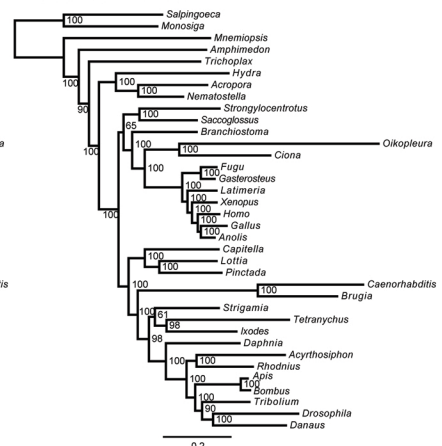

G 'LowLB' ML tree

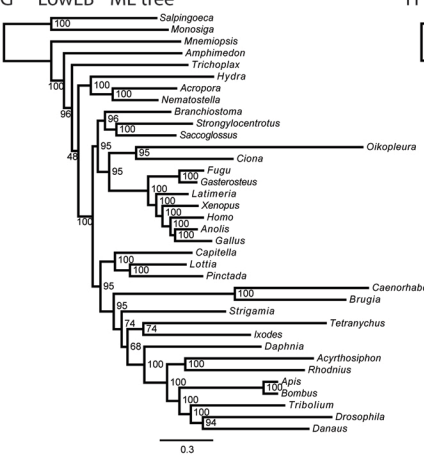

H 'Saturation108' ML tree

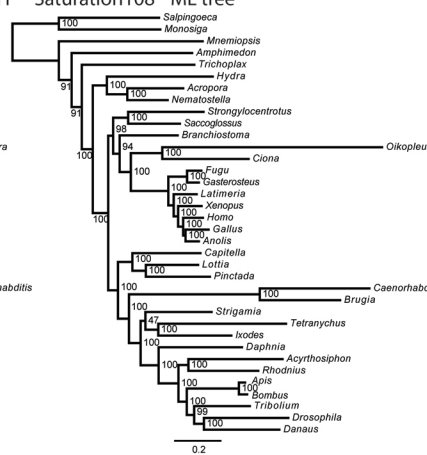

I 'Best108' ML tree

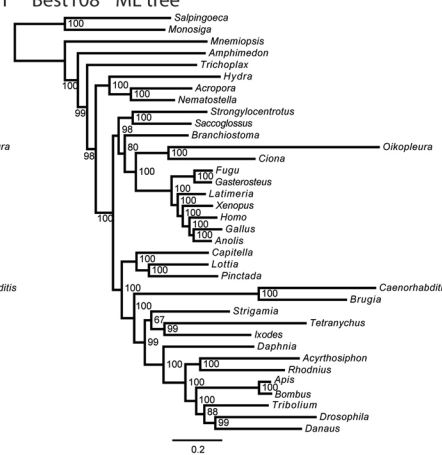

Supplement: Supplementary file [file 013946-2.pdf]
